# Supplementary material
Source: ML conference proceedings conference paper supplement (https://openreview.net/forum?id=rUXzk_Us9lc)
Supplement: supplementary_material [file attachment]

# Can Mean Field Control (MFC) Approximate Cooperative Multi Agent Reinforcement Learning (MARL) with Non-Uniform Interaction? (Supplementary Material)

Washim Uddin Mondal<sup>1,2</sup>

Vaneet Aggarwal<sup>1</sup>

Satish V. Ukkusuri<sup>2</sup>

<sup>1</sup>School of Industrial Engineering, Purdue University, West Lafayette, Indiana, USA 47907

<sup>2</sup>Lyles School of Civil Engineering, Purdue University, West Lafayette, Indiana, USA 47907

## A PROOF OF COROLLARY 1

The following inequalities hold  $\forall x \in \mathcal{X}, \forall u \in \mathcal{U}, \forall \mu_1 \in \mathcal{P}(\mathcal{X})$ , and  $\forall \nu_1 \in \mathcal{P}(\mathcal{U})$ .

$$\begin{aligned} |r(x, u, \mu_1, \nu_1)| &\leq |\mathbf{a}^T \mu_1| + |\mathbf{b}^T \nu_1| + |f(x, u)| \\ &\leq |\mathbf{a}|_1 |\mu_1|_1 + |\mathbf{b}|_1 |\nu_1|_1 + |f(x, u)| \\ &\stackrel{(a)}{=} |\mathbf{a}|_1 + |\mathbf{b}|_1 + |f(x, u)| \end{aligned}$$

Equality (a) follows from the fact that both  $\mu_1$  and  $\nu_1$  are probability distributions. As the sets  $\mathcal{X}, \mathcal{U}$  are finite, there must exist  $M_F > 0$  such that,  $|f(x, u)| \leq M_F, \forall x \in \mathcal{X}, \forall u \in \mathcal{U}$ . Taking  $M_R = |\mathbf{a}|_1 + |\mathbf{b}|_1 + M_F$ , we can establish proposition (a).

Proposition (b) follows from the fact that  $\forall x \in \mathcal{X}, \forall u \in \mathcal{U}, \forall \mu_1, \mu_2 \in \mathcal{P}(\mathcal{X}), \forall \nu_1, \nu_2 \in \mathcal{P}(\mathcal{U})$ , the following relations hold.

$$\begin{aligned} |r(x, u, \mu_1, \nu_2) - r(x, u, \mu_2, \nu_2)| &\leq |\mathbf{a}^T (\mu_1 - \mu_2)| + |\mathbf{b}^T (\nu_1 - \nu_2)| \\ &\leq |\mathbf{a}|_1 |\mu_1 - \mu_2|_1 + |\mathbf{b}|_1 |\nu_1 - \nu_2|_1 \end{aligned}$$

Taking  $L_R = \max\{|\mathbf{a}|_1, |\mathbf{b}|_1\}$ , we conclude the result.

## B PROOF OF THEOREM 1

The following results are necessary to establish the theorem.

### B.1 LIPSCHITZ CONTINUITY

In the following three lemmas, we shall establish that the functions,  $\nu^{\text{MF}}, P^{\text{MF}}$  and  $r^{\text{MF}}$  defined in (8), (9) and (10) are Lipschitz continuous. In all of these lemmas, the term  $\Pi$  denotes the set of policies that satisfies Assumption 3. The proofs of these lemmas are delegated to Appendix C, D, and E respectively.

**Lemma B.1.** *If  $\nu^{\text{MF}}(\cdot, \cdot)$  is defined by (8), then  $\forall \mu_1, \mu_2 \in \mathcal{P}(\mathcal{X}), \forall \pi \in \Pi$ , the following inequality holds.*

$$|\nu^{\text{MF}}(\mu_1, \pi) - \nu^{\text{MF}}(\mu_2, \pi)|_1 \leq (1 + L_Q) |\mu_1 - \mu_2|_1$$

where  $L_Q$  is defined in Assumption 3.

**Lemma B.2.** *If  $P^{\text{MF}}(\cdot, \cdot)$  is defined by (9), then  $\forall \mu_1, \mu_2 \in \mathcal{P}(\mathcal{X}), \forall \pi \in \Pi$ , the following inequality holds.*

$$|P^{\text{MF}}(\mu_1, \pi) - P^{\text{MF}}(\mu_2, \pi)|_1 \leq S_P |\mu_1 - \mu_2|_1$$

where  $S_P \triangleq (1 + L_Q) + L_P(2 + L_Q)$ .

The terms  $L_P$ , and  $L_Q$  are defined in Assumption 1, and 3 respectively.

**Lemma B.3.** *If  $r^{\text{MF}}(\cdot, \cdot)$  is defined by (10), then  $\forall \mu_1, \mu_2 \in \mathcal{P}(\mathcal{X}), \forall \pi \in \Pi$ , the following inequality holds.*

$$|r^{\text{MF}}(\mu_1, \pi) - r^{\text{MF}}(\mu_2, \pi)|_1 \leq S_R |\mu_1 - \mu_2|_1$$

where  $S_R \triangleq M_R(1 + L_Q) + L_R(2 + L_Q)$ .

The terms  $M_R, L_R$ , and  $L_Q$  are defined in Corollary 1 and Assumption 3 respectively.

### B.2 APPROXIMATION RESULTS

The following Lemma B.5, B.6, B.7 establish that the state, action distributions and the average reward of an  $N$ -agent system closely approximate their mean-field counterparts when  $N$  is large. All of these results use Lemma B.4 as the key ingredient.

**Lemma B.4.** *[Mondal et al., 2022] Assume that  $\forall m \in [M], \{X_{m,n}\}_{n \in [N]}$  are independent random variables that lie in the interval  $[0, 1]$ , and satisfy the following constraint:  $\sum_{m \in [M]} \mathbb{E}[X_{m,n}] = 1, \forall n \in [N]$ . If  $\{C_{m,n}\}_{m \in [M], n \in [N]}$  are constants that obey  $|C_{m,n}| \leq C, \forall m \in [M], \forall n \in [N]$ , then the following inequality holds.*

$$\sum_{m \in [M]} \mathbb{E} \left| C_{m,n} (X_{m,n} - \mathbb{E}[X_{m,n}]) \right| \leq C \sqrt{MN}$$

The proofs of Lemma B.5, B.6, and B.7 have been delegated to Appendix F, G, and H respectively.

**Lemma B.5.** Assume  $\{\boldsymbol{\mu}_t^N, \boldsymbol{\nu}_t^N\}_{t \in \mathbb{T}}$  are empirical state and action distributions of an  $N$ -agent system defined by (1), and (2) respectively. If these distributions are generated by a sequence of policies  $\boldsymbol{\pi} = \{\pi_t\}_{t \in \mathbb{T}}$ , then  $\forall t \in \mathbb{T}$  the following inequality holds.

$$\mathbb{E}|\boldsymbol{\nu}_t^N - \nu^{\text{MF}}(\boldsymbol{\mu}_t^N, \pi_t)|_1 \leq \frac{\sqrt{|\mathcal{U}|}}{\sqrt{N}}$$

where  $\nu^{\text{MF}}$  is defined in (8).

**Lemma B.6.** Assume  $\{\boldsymbol{\mu}_t^N, \boldsymbol{\nu}_t^N\}_{t \in \mathbb{T}}$  are empirical state and action distributions of an  $N$ -agent system defined by (1), and (2) respectively. If these distributions are generated by a sequence of policies  $\boldsymbol{\pi} = \{\pi_t\}_{t \in \mathbb{T}}$ , then  $\forall t \in \mathbb{T}$  the following inequality holds.

$$\mathbb{E}|\boldsymbol{\mu}_{t+1}^N - P^{\text{MF}}(\boldsymbol{\mu}_t^N, \pi_t)|_1 \leq \frac{C_P}{\sqrt{N}} \left[ \sqrt{|\mathcal{X}|} + \sqrt{|\mathcal{U}|} \right]$$

where  $P^{\text{MF}}$  is defined in (9),  $C_P \triangleq 2 + L_P$ , and  $L_P$  is given in Assumption 1.

**Lemma B.7.** Assume  $\{\boldsymbol{\mu}_t^N, \boldsymbol{\nu}_t^N\}_{t \in \mathbb{T}}$  are empirical state and action distributions of an  $N$ -agent system defined by (1), and (2) respectively. Also,  $\forall i \in [N]$ , let  $\{\boldsymbol{\mu}_t^{i,N}, \boldsymbol{\nu}_t^{i,N}\}$  be weighted state and action distributions defined by (3), (4). If these distributions are generated by a sequence of policies  $\boldsymbol{\pi} = \{\pi_t\}_{t \in \mathbb{T}}$ , then  $\forall t \in \mathbb{T}$  the following inequality holds.

$$\mathbb{E} \left| \frac{1}{N} \sum_{i=1}^N r(x_t^i, u_t^i, \boldsymbol{\mu}_t^{i,N}, \boldsymbol{\nu}_t^{i,N}) - r^{\text{MF}}(\boldsymbol{\mu}_t^N, \pi_t) \right| \leq C_R \frac{\sqrt{|\mathcal{U}|}}{\sqrt{N}}$$

where  $r^{\text{MF}}$  is given in (10),  $C_R \triangleq |\mathbf{b}|_1 + M_F$  and  $M_F$  is such that  $|f(x, u)| \leq M_F, \forall x \in \mathcal{X}, \forall u \in \mathcal{U}$ . The function  $f(\cdot, \cdot)$  and the parameter  $\mathbf{b}$  are defined in Assumption 2. We would like to mention that  $M_F$  always exists since  $\mathcal{X}, \mathcal{U}$  are finite.

### B.3 PROOF OF THE THEOREM

Note that,

$$\begin{aligned} & |v_{\text{MARL}}(\mathbf{x}_0, \boldsymbol{\pi}) - v_{\text{MF}}(\boldsymbol{\mu}_0, \boldsymbol{\pi})| \\ & \stackrel{(a)}{=} \left| \sum_{t=0}^{\infty} \frac{1}{N} \sum_{i=1}^N \gamma^t \mathbb{E}[r(x_t^i, u_t^i, \boldsymbol{\mu}_t^{i,N}, \boldsymbol{\nu}_t^{i,N})] \right. \\ & \quad \left. - \sum_{t=0}^{\infty} \gamma^t r^{\text{MF}}(\boldsymbol{\mu}_t, \pi_t) \right| \leq J_1 + J_2 \end{aligned}$$

Equality (a) directly follows from the definitions (7) and (10). The first term  $J_1$  can be written as follows.

$$\begin{aligned} J_1 & \triangleq \sum_{t=0}^{\infty} \gamma^t \mathbb{E} \left| \frac{1}{N} \sum_{i=1}^N [r(x_t^i, u_t^i, \boldsymbol{\mu}_t^{i,N}, \boldsymbol{\nu}_t^{i,N})] - r^{\text{MF}}(\boldsymbol{\mu}_t^N, \pi_t) \right| \\ & \stackrel{(a)}{\leq} C_R \frac{\sqrt{|\mathcal{U}|}}{\sqrt{N}} \frac{1}{1-\gamma} \end{aligned}$$

Equation (a) is a result of Lemma B.7. The second term can be expressed as follows.

$$\begin{aligned} J_2 & \triangleq \sum_{t=0}^{\infty} \gamma^t \mathbb{E} |r^{\text{MF}}(\boldsymbol{\mu}_t^N, \pi_t) - r^{\text{MF}}(\boldsymbol{\mu}_t, \pi_t)| \\ & \stackrel{(a)}{\leq} S_R \sum_{t=0}^{\infty} \gamma^t |\boldsymbol{\mu}_t^N - \boldsymbol{\mu}_t|_1 \end{aligned}$$

Inequality (a) follows from Lemma B.3. Observe that,  $\forall t \in \mathbb{T}$ ,

$$\begin{aligned} & |\boldsymbol{\mu}_{t+1}^N - \boldsymbol{\mu}_{t+1}|_1 \\ & \leq |\boldsymbol{\mu}_{t+1}^N - P^{\text{MF}}(\boldsymbol{\mu}_t^N, \pi_t)|_1 + |P^{\text{MF}}(\boldsymbol{\mu}_t^N, \pi_t) - \boldsymbol{\mu}_{t+1}|_1 \\ & \stackrel{(a)}{\leq} \frac{C_P}{\sqrt{N}} \left[ \sqrt{|\mathcal{X}|} + \sqrt{|\mathcal{U}|} \right] \\ & \quad + |P^{\text{MF}}(\boldsymbol{\mu}_t^N, \pi_t) - P^{\text{MF}}(\boldsymbol{\mu}_t, \pi_t)|_1 \\ & \stackrel{(b)}{\leq} \frac{C_P}{\sqrt{N}} \left[ \sqrt{|\mathcal{X}|} + \sqrt{|\mathcal{U}|} \right] + S_P |\boldsymbol{\mu}_t^N - \boldsymbol{\mu}_t|_1 \\ & \stackrel{(c)}{\leq} \frac{C_P}{\sqrt{N}} \left[ \sqrt{|\mathcal{X}|} + \sqrt{|\mathcal{U}|} \right] \frac{(S_P^{t+1} - 1)}{S_P - 1} \end{aligned}$$

Inequality (a) follows from Lemma B.6 and Eq. (9) while (b) is a result of Lemma B.2. Finally, inequality (c) can be derived by recursively applying (b). Therefore, the term  $J_2$  can be upper bounded as follows.

$$J_2 \leq \frac{1}{\sqrt{N}} \left[ \sqrt{|\mathcal{X}|} + \sqrt{|\mathcal{U}|} \right] \frac{S_R C_P}{S_P - 1} \left[ \frac{1}{1 - \gamma S_P} - \frac{1}{1 - \gamma} \right]$$

This concludes the theorem.

## C PROOF OF LEMMA B.1

The following inequalities hold true.

$$\begin{aligned}
& |\nu^{\text{MF}}(\boldsymbol{\mu}_1, \pi) - \nu^{\text{MF}}(\boldsymbol{\mu}_2, \pi)|_1 \\
&= \left| \sum_{x \in \mathcal{X}} \pi(x, \boldsymbol{\mu}_1) \boldsymbol{\mu}_1(x) - \sum_{x \in \mathcal{X}} \pi(x, \boldsymbol{\mu}_2) \boldsymbol{\mu}_2(x) \right|_1 \\
&= \sum_{u \in \mathcal{U}} \left| \sum_{x \in \mathcal{X}} \pi(x, \boldsymbol{\mu}_1)(u) \boldsymbol{\mu}_1(x) - \sum_{x \in \mathcal{X}} \pi(x, \boldsymbol{\mu}_2)(u) \boldsymbol{\mu}_2(x) \right| \\
&\leq \sum_{u \in \mathcal{U}} \left| \sum_{x \in \mathcal{X}} \pi(x, \boldsymbol{\mu}_1)(u) \boldsymbol{\mu}_1(x) - \sum_{x \in \mathcal{X}} \pi(x, \boldsymbol{\mu}_2)(u) \boldsymbol{\mu}_1(x) \right| \\
&\quad + \sum_{u \in \mathcal{U}} \left| \sum_{x \in \mathcal{X}} \pi(x, \boldsymbol{\mu}_2)(u) \boldsymbol{\mu}_1(x) - \sum_{x \in \mathcal{X}} \pi(x, \boldsymbol{\mu}_2)(u) \boldsymbol{\mu}_2(x) \right| \\
&\leq \sum_{x \in \mathcal{X}} \boldsymbol{\mu}_1(x) \sum_{u \in \mathcal{U}} |\pi(x, \boldsymbol{\mu}_1)(u) - \pi(x, \boldsymbol{\mu}_2)(u)| \\
&\quad + \sum_{x \in \mathcal{X}} |\boldsymbol{\mu}_1(x) - \boldsymbol{\mu}_2(x)| \sum_{u \in \mathcal{U}} \pi(x, \boldsymbol{\mu}_2)(u) \\
&\stackrel{(a)}{\leq} L_Q |\boldsymbol{\mu}_1 - \boldsymbol{\mu}_2|_1 \sum_{x \in \mathcal{X}} \boldsymbol{\mu}_1(x) + |\boldsymbol{\mu}_1 - \boldsymbol{\mu}_2|_1 \\
&\stackrel{(b)}{=} (1 + L_Q) |\boldsymbol{\mu}_1 - \boldsymbol{\mu}_2|_1
\end{aligned}$$

Inequality (a) is a consequence of the fact that  $\pi \in \Pi$  and  $\pi(x, \boldsymbol{\mu}_2)$  is a distribution. Finally, the equality (b) follows because  $\boldsymbol{\mu}_1$  is a distribution. This concludes the result.

## D PROOF OF LEMMA B.2

Note the following inequalities.

$$\begin{aligned}
& |P^{\text{MF}}(\boldsymbol{\mu}_1, \pi) - P^{\text{MF}}(\boldsymbol{\mu}_2, \pi)|_1 \\
&= \left| \sum_{x \in \mathcal{X}} \sum_{u \in \mathcal{U}} P(x, u, \boldsymbol{\mu}_1, \nu^{\text{MF}}(\boldsymbol{\mu}_1, \pi)) \pi(x, \boldsymbol{\mu}_1)(u) \boldsymbol{\mu}_1(x) \right. \\
&\quad \left. - \sum_{x \in \mathcal{X}} \sum_{u \in \mathcal{U}} P(x, u, \boldsymbol{\mu}_2, \nu^{\text{MF}}(\boldsymbol{\mu}_2, \pi)) \pi(x, \boldsymbol{\mu}_2)(u) \boldsymbol{\mu}_2(x) \right|_1 \\
&\leq J_1 + J_2
\end{aligned}$$

where the term  $J_1$  is as follows.

$$\begin{aligned}
J_1 &\triangleq \sum_{x \in \mathcal{X}} \sum_{u \in \mathcal{U}} \pi(x, \boldsymbol{\mu}_1)(u) \boldsymbol{\mu}_1(x) \\
&\quad \times \left| P(x, u, \boldsymbol{\mu}_1, \nu^{\text{MF}}(\boldsymbol{\mu}_1, \pi)) - P(x, u, \boldsymbol{\mu}_2, \nu^{\text{MF}}(\boldsymbol{\mu}_2, \pi)) \right|_1 \\
&\stackrel{(a)}{\leq} \sum_{x \in \mathcal{X}} \sum_{u \in \mathcal{U}} \pi(x, \boldsymbol{\mu}_1)(u) \boldsymbol{\mu}_1(x) \\
&\quad \times L_P \left\{ |\boldsymbol{\mu}_1 - \boldsymbol{\mu}_2|_1 + |\nu^{\text{MF}}(\boldsymbol{\mu}_1, \pi) - \nu^{\text{MF}}(\boldsymbol{\mu}_2, \pi)|_1 \right\} \\
&\stackrel{(b)}{\leq} L_P (2 + L_Q) |\boldsymbol{\mu}_1 - \boldsymbol{\mu}_2|_1
\end{aligned}$$

Inequality (a) follows from Assumption 1 whereas (b) uses Lemma B.1 and the fact that  $\boldsymbol{\mu}_1, \pi(x, \boldsymbol{\mu}_1)$  are distributions. The term  $J_2$  is given as follows.

$$\begin{aligned}
J_2 &\triangleq \sum_{x \in \mathcal{X}} \sum_{u \in \mathcal{U}} \left| P(x, u, \boldsymbol{\mu}_2, \nu^{\text{MF}}(\boldsymbol{\mu}_2, \pi)) \right|_1 \\
&\quad \times \left| \pi(x, \boldsymbol{\mu}_1)(u) \boldsymbol{\mu}_1(x) - \pi(x, \boldsymbol{\mu}_2)(u) \boldsymbol{\mu}_2(x) \right| \\
&\stackrel{(a)}{=} \sum_{x \in \mathcal{X}} \sum_{u \in \mathcal{U}} \left| \pi(x, \boldsymbol{\mu}_1)(u) \boldsymbol{\mu}_1(x) - \pi(x, \boldsymbol{\mu}_2)(u) \boldsymbol{\mu}_2(x) \right| \\
&\leq \sum_{x \in \mathcal{X}} \boldsymbol{\mu}_1(x) \sum_{u \in \mathcal{U}} |\pi(x, \boldsymbol{\mu}_1)(u) - \pi(x, \boldsymbol{\mu}_2)(u)| \\
&\quad + \sum_{x \in \mathcal{X}} |\boldsymbol{\mu}_1(x) - \boldsymbol{\mu}_2(x)| \sum_{u \in \mathcal{U}} \pi(x, \boldsymbol{\mu}_2)(u) \\
&\stackrel{(b)}{\leq} L_Q |\boldsymbol{\mu}_1 - \boldsymbol{\mu}_2|_1 \sum_{x \in \mathcal{X}} \boldsymbol{\mu}_1(x) + |\boldsymbol{\mu}_1 - \boldsymbol{\mu}_2|_1 \\
&\stackrel{(c)}{=} (1 + L_Q) |\boldsymbol{\mu}_1 - \boldsymbol{\mu}_2|_1
\end{aligned}$$

Equality (a) uses the fact that  $P(x, u, \boldsymbol{\mu}_2, \nu^{\text{MF}}(\boldsymbol{\mu}_2, \pi))$  is a distribution. Inequality (b) follows from Assumption 3 while equation (c) holds because  $\boldsymbol{\mu}_1$  is a distribution.

## E PROOF OF LEMMA B.3

The following inequalities hold true.

$$\begin{aligned}
& |r^{\text{MF}}(\boldsymbol{\mu}_1, \pi) - r^{\text{MF}}(\boldsymbol{\mu}_2, \pi)|_1 \\
&= \left| \sum_{x \in \mathcal{X}} \sum_{u \in \mathcal{U}} r(x, u, \boldsymbol{\mu}_1, \nu^{\text{MF}}(\boldsymbol{\mu}_1, \pi)) \pi(x, \boldsymbol{\mu}_1)(u) \boldsymbol{\mu}_1(x) \right. \\
&\quad \left. - \sum_{x \in \mathcal{X}} \sum_{u \in \mathcal{U}} r(x, u, \boldsymbol{\mu}_2, \nu^{\text{MF}}(\boldsymbol{\mu}_2, \pi)) \pi(x, \boldsymbol{\mu}_2)(u) \boldsymbol{\mu}_2(x) \right|_1 \\
&\leq J_1 + J_2
\end{aligned}$$

where the term  $J_1$  is given as follows.

$$\begin{aligned}
J_1 &\triangleq \sum_{x \in \mathcal{X}} \sum_{u \in \mathcal{U}} \pi(x, \boldsymbol{\mu}_1)(u) \boldsymbol{\mu}_1(x) \\
&\quad \times \left| r(x, u, \boldsymbol{\mu}_1, \nu^{\text{MF}}(\boldsymbol{\mu}_1, \pi)) - r(x, u, \boldsymbol{\mu}_2, \nu^{\text{MF}}(\boldsymbol{\mu}_2, \pi)) \right| \\
&\stackrel{(a)}{\leq} \sum_{x \in \mathcal{X}} \sum_{u \in \mathcal{U}} \pi(x, \boldsymbol{\mu}_1)(u) \boldsymbol{\mu}_1(x) \\
&\quad \times L_R \left\{ |\boldsymbol{\mu}_1 - \boldsymbol{\mu}_2|_1 + |\nu^{\text{MF}}(\boldsymbol{\mu}_1, \pi) - \nu^{\text{MF}}(\boldsymbol{\mu}_2, \pi)|_1 \right\} \\
&\stackrel{(b)}{\leq} L_R (2 + L_Q) |\boldsymbol{\mu}_1 - \boldsymbol{\mu}_2|_1
\end{aligned}$$

Inequality (a) follows from Corollary 1(b) whereas (b) uses Lemma B.1 and the fact that  $\boldsymbol{\mu}_1, \pi(x, \boldsymbol{\mu}_1)$  are distributions.

The term  $J_2$  is given as follows.

$$\begin{aligned}
J_2 &\triangleq \sum_{x \in \mathcal{X}} \sum_{u \in \mathcal{U}} |r(x, u, \boldsymbol{\mu}_2, \nu^{\text{MF}}(\boldsymbol{\mu}_2, \pi))| \\
&\times \left| \pi(x, \boldsymbol{\mu}_1)(u) \boldsymbol{\mu}_1(x) - \pi(x, \boldsymbol{\mu}_2)(u) \boldsymbol{\mu}_2(x) \right| \\
&\stackrel{(a)}{\leq} M_R \sum_{x \in \mathcal{X}} \sum_{u \in \mathcal{U}} \left| \pi(x, \boldsymbol{\mu}_1)(u) \boldsymbol{\mu}_1(x) - \pi(x, \boldsymbol{\mu}_2)(u) \boldsymbol{\mu}_2(x) \right| \\
&\leq M_R \sum_{x \in \mathcal{X}} \boldsymbol{\mu}_1(x) \sum_{u \in \mathcal{U}} |\pi(x, \boldsymbol{\mu}_1)(u) - \pi(x, \boldsymbol{\mu}_2)(u)| \\
&+ M_R \sum_{x \in \mathcal{X}} |\boldsymbol{\mu}_1(x) - \boldsymbol{\mu}_2(x)| \sum_{u \in \mathcal{U}} \pi(x, \boldsymbol{\mu}_2)(u) \\
&\stackrel{(b)}{\leq} M_R L_Q |\boldsymbol{\mu}_1 - \boldsymbol{\mu}_2|_1 \sum_{x \in \mathcal{X}} \boldsymbol{\mu}_1(x) + M_R |\boldsymbol{\mu}_1 - \boldsymbol{\mu}_2|_1 \\
&\stackrel{(c)}{\leq} M_R (1 + L_Q) |\boldsymbol{\mu}_1 - \boldsymbol{\mu}_2|_1
\end{aligned}$$

Inequality (a) uses Corollary 1(a). Inequality (b) follows from Assumption 3 while equation (c) holds because  $\boldsymbol{\mu}_1$  is a distribution. This concludes the lemma.

## F PROOF OF LEMMA B.5

Applying the definitions of  $\nu_t^N$  and  $\nu^{\text{MF}}$ , we can write the following.

$$\begin{aligned}
&\mathbb{E} |\nu_t^N - \nu^{\text{MF}}(\boldsymbol{\mu}_t^N, \pi_t)|_1 \\
&= \sum_{u \in \mathcal{U}} \mathbb{E} |\nu_t^N(u) - \nu^{\text{MF}}(\boldsymbol{\mu}_t^N, \pi_t)(u)| \\
&= \sum_{u \in \mathcal{U}} \mathbb{E} \left| \frac{1}{N} \sum_{i=1}^N \delta(u_t^i = u) - \sum_{x \in \mathcal{X}} \pi_t(x, \boldsymbol{\mu}_t^N)(u) \boldsymbol{\mu}_t^N(x) \right|
\end{aligned} \tag{1}$$

Similarly, using the definition of  $\boldsymbol{\mu}_t^N$ , we get,

$$\begin{aligned}
&\sum_{x \in \mathcal{X}} \pi_t(x, \boldsymbol{\mu}_t^N)(u) \boldsymbol{\mu}_t^N(x) \\
&= \sum_{x \in \mathcal{X}} \pi_t(x, \boldsymbol{\mu}_t^N)(u) \frac{1}{N} \sum_{i=1}^N \delta(x_t^i = x) \\
&= \frac{1}{N} \sum_{i=1}^N \sum_{x \in \mathcal{X}} \pi_t(x, \boldsymbol{\mu}_t^N)(u) \delta(x_t^i = x) \\
&= \frac{1}{N} \sum_{i=1}^N \pi_t(x_t^i, \boldsymbol{\mu}_t^N)
\end{aligned} \tag{2}$$

Substituting into (1), we obtain the following.

$$\begin{aligned}
&\mathbb{E} |\nu_t^N - \nu^{\text{MF}}(\boldsymbol{\mu}_t^N, \pi_t)|_1 \\
&= \frac{1}{N} \sum_{u \in \mathcal{U}} \mathbb{E} \left| \sum_{i=1}^N \delta(u_t^i = u) - \pi_t(x_t^i, \boldsymbol{\mu}_t^N)(u) \right| \\
&\stackrel{(a)}{\leq} \frac{\sqrt{|\mathcal{U}|}}{\sqrt{N}}
\end{aligned}$$

Inequality (a) is a consequence of Lemma B.4. Particularly, we use the fact that  $\forall u \in \mathcal{U}$ , the random variables  $\{\delta(u_t^i = u)\}_{i \in [N]}$  lie in  $[0, 1]$ , are conditionally independent given  $\mathbf{x}_t \triangleq \{x_t^i\}_{i \in [N]}$  (thereby given  $\boldsymbol{\mu}_t^N$ ), and satisfy the following constraints.

$$\begin{aligned}
&\mathbb{E} [\delta(u_t^i = u) | \mathbf{x}_t] = \pi_t(x_t^i, \boldsymbol{\mu}_t^N) \\
&\sum_{u \in \mathcal{U}} \mathbb{E} [\delta(u_t^i = u) | \mathbf{x}_t] = 1, \forall i \in [N]
\end{aligned}$$

## G PROOF OF LEMMA B.6

Using the definition of  $P^{\text{MF}}$ , we get the following.

$$\begin{aligned}
&P^{\text{MF}}(\boldsymbol{\mu}_t^N, \pi_t) \\
&= \sum_{x \in \mathcal{X}} \sum_{u \in \mathcal{U}} P(x, u, \boldsymbol{\mu}_t^N, \nu^{\text{MF}}(\boldsymbol{\mu}_t^N, \pi_t)) \pi_t(x, \boldsymbol{\mu}_t^N)(u) \boldsymbol{\mu}_t^N(x) \\
&= \sum_{x \in \mathcal{X}} \sum_{u \in \mathcal{U}} P(x, u, \boldsymbol{\mu}_t^N, \nu^{\text{MF}}(\boldsymbol{\mu}_t^N, \pi_t)) \pi_t(x, \boldsymbol{\mu}_t^N)(u) \boldsymbol{\mu}_t^N(x) \\
&\quad \times \frac{1}{N} \sum_{i=1}^N \delta(x_t^i = x) \\
&= \frac{1}{N} \sum_{i=1}^N \sum_{u \in \mathcal{U}} P(x_t^i, u, \boldsymbol{\mu}_t^N, \nu^{\text{MF}}(\boldsymbol{\mu}_t^N, \pi_t)) \pi_t(x_t^i, \boldsymbol{\mu}_t^N)(u)
\end{aligned}$$

Using the definition of  $L_1$  norm, we can write the following.

$$\begin{aligned}
&\mathbb{E} |\boldsymbol{\mu}_{t+1}^N - P^{\text{MF}}(\boldsymbol{\mu}_t^N, \pi_t)|_1 \\
&= \sum_{x \in \mathcal{X}} \mathbb{E} |\boldsymbol{\mu}_{t+1}^N(x) - P^{\text{MF}}(\boldsymbol{\mu}_t^N, \pi_t)(x)|_1 \\
&= \frac{1}{N} \sum_{x \in \mathcal{X}} \mathbb{E} \left| \sum_{i=1}^N \delta(x_{t+1}^i = x) \right. \\
&\quad \left. - \sum_{i=1}^N \sum_{u \in \mathcal{U}} P(x_t^i, u, \boldsymbol{\mu}_t^N, \nu^{\text{MF}}(\boldsymbol{\mu}_t^N, \pi_t))(x) \pi_t(x_t^i, \boldsymbol{\mu}_t^N)(u) \right| \\
&\leq J_1 + J_2 + J_3
\end{aligned}$$

The first term,  $J_1$  is given as follows.

$$\begin{aligned}
J_1 &\triangleq \frac{1}{N} \sum_{x \in \mathcal{X}} \mathbb{E} \left| \sum_{i=1}^N \delta(x_{t+1}^i = x) - P(x_t^i, u_t^i, \boldsymbol{\mu}_t^N, \nu_t^N)(x) \right| \\
&\stackrel{(a)}{\leq} \frac{\sqrt{|\mathcal{X}|}}{\sqrt{N}}
\end{aligned}$$

Inequality (a) follows from Lemma B.4. Specifically, we use the fact that,  $\forall x \in \mathcal{X}$ , the random variables  $\{\delta(x_{t+1}^i = x)\}_{i \in [N]}$  lie in  $[0, 1]$ , are conditionally independent given  $\mathbf{x}_t \triangleq \{x_t^i\}_{i \in [N]}$ ,  $\mathbf{u}_t \triangleq \{u_t^i\}_{i \in [N]}$ , (thereby given  $\boldsymbol{\mu}_t^N, \boldsymbol{\nu}_t^N$ ) and satisfy the following.

$$\begin{aligned} \mathbb{E}[\delta(x_{t+1}^i = x)|\mathbf{x}_t, \mathbf{u}_t] &= P(x_t^i, u_t^i, \boldsymbol{\mu}_t^N, \boldsymbol{\nu}_t^N), \\ \sum_{x \in \mathcal{X}} \mathbb{E}[\delta(x_{t+1}^i = x)|\mathbf{x}_t, \mathbf{u}_t] &= 1, \quad \forall i \in [N] \end{aligned}$$

The second term  $J_2$  can be expressed as follows.

$$\begin{aligned} J_2 &\triangleq \frac{1}{N} \sum_{x \in \mathcal{X}} \mathbb{E} \left| \sum_{i=1}^N P(x_t^i, u_t^i, \boldsymbol{\mu}_t^N, \boldsymbol{\nu}_t^N)(x) \right. \\ &\quad \left. - P(x_t^i, u_t^i, \boldsymbol{\mu}_t^N, \nu^{\text{MF}}(\boldsymbol{\mu}_t^N, \pi_t))(x) \right| \\ &\leq \frac{1}{N} \sum_{i=1}^N \mathbb{E} \left| P(x_t^i, u_t^i, \boldsymbol{\mu}_t^N, \boldsymbol{\nu}_t^N) \right. \\ &\quad \left. - P(x_t^i, u_t^i, \boldsymbol{\mu}_t^N, \nu^{\text{MF}}(\boldsymbol{\mu}_t^N, \pi_t)) \right|_1 \\ &\stackrel{(a)}{\leq} L_P \mathbb{E} |\boldsymbol{\nu}_t^N - \nu^{\text{MF}}(\boldsymbol{\mu}_t^N, \pi_t)| \stackrel{(b)}{\leq} L_P \frac{\sqrt{|\mathcal{U}|}}{\sqrt{N}} \end{aligned}$$

Inequality (a) follows from Assumption 1 whereas (b) results from Lemma B.5. Finally, the term  $J_3$  is defined as follows.

$$\begin{aligned} J_3 &\triangleq \frac{1}{N} \sum_{x \in \mathcal{X}} \mathbb{E} \left| \sum_{i=1}^N P(x_t^i, u_t^i, \boldsymbol{\mu}_t^N, \nu^{\text{MF}}(\boldsymbol{\mu}_t^N, \pi_t))(x) \right. \\ &\quad \left. - \sum_{i=1}^N \sum_{u \in \mathcal{U}} P(x_t^i, u, \boldsymbol{\mu}_t^N, \nu^{\text{MF}}(\boldsymbol{\mu}_t^N, \pi_t))(x) \pi_t(x_t^i, \boldsymbol{\mu}_t^N)(u) \right| \\ &\stackrel{(a)}{\leq} \frac{\sqrt{|\mathcal{X}|}}{\sqrt{N}} \end{aligned}$$

Relation (a) results from Lemma B.4. Particularly we use the fact that  $\forall x \in \mathcal{X}$ ,  $\{P(x_t^i, u_t^i, \boldsymbol{\mu}_t^N, \nu^{\text{MF}}(\boldsymbol{\mu}_t^N, \pi_t))(x)\}_{i \in [N]}$  lie in the interval  $[0, 1]$ , are conditionally independent given  $\mathbf{x}_t \triangleq \{x_t^i\}_{i \in [N]}$  (therefore, given  $\boldsymbol{\mu}_t^N$ ), and satisfy the following constraints.

$$\begin{aligned} &\mathbb{E}[P(x_t^i, u_t^i, \boldsymbol{\mu}_t^N, \nu^{\text{MF}}(\boldsymbol{\mu}_t^N, \pi_t))(x)|\mathbf{x}_t] \\ &= \sum_{u \in \mathcal{U}} P(x_t^i, u, \boldsymbol{\mu}_t^N, \nu^{\text{MF}}(\boldsymbol{\mu}_t^N, \pi_t))(x) \pi_t(x_t^i, \boldsymbol{\mu}_t^N)(u), \\ &\text{and } \sum_{x \in \mathcal{X}} \mathbb{E}[P(x_t^i, u_t^i, \boldsymbol{\mu}_t^N, \nu^{\text{MF}}(\boldsymbol{\mu}_t^N, \pi_t))(x)|\mathbf{x}_t] = 1 \end{aligned}$$

This concludes the Lemma.

## H PROOF OF LEMMA B.7

Note that,

$$\begin{aligned} r^{\text{MF}}(\boldsymbol{\mu}_t^N, \pi_t) &= \sum_{x \in \mathcal{X}} \sum_{u \in \mathcal{U}} r(x, u, \boldsymbol{\mu}_t^N, \nu^{\text{MF}}(\boldsymbol{\mu}_t^N, \pi_t)) \pi_t(x, \boldsymbol{\mu}_t^N)(u) \boldsymbol{\mu}_t^N(x) \\ &= \sum_{x \in \mathcal{X}} \sum_{u \in \mathcal{U}} r(x, u, \boldsymbol{\mu}_t^N, \nu^{\text{MF}}(\boldsymbol{\mu}_t^N, \pi_t)) \pi_t(x, \boldsymbol{\mu}_t^N)(u) \\ &\quad \times \frac{1}{N} \sum_{i=1}^N \delta(x_t^i = x) \\ &= \frac{1}{N} \sum_{u \in \mathcal{U}} \sum_{i=1}^N r(x_t^i, u, \boldsymbol{\mu}_t^N, \nu^{\text{MF}}(\boldsymbol{\mu}_t^N, \pi_t)) \pi_t(x_t^i, \boldsymbol{\mu}_t^N)(u) \\ &\stackrel{(a)}{=} \frac{1}{N} \sum_{u \in \mathcal{U}} \sum_{i=1}^N \left[ \mathbf{a}^T \boldsymbol{\mu}_t^N + \mathbf{b}^T \nu^{\text{MF}}(\boldsymbol{\mu}_t^N, \pi_t) + f(x_t^i, u) \right] \\ &\quad \times \pi_t(x_t^i, \boldsymbol{\mu}_t^N)(u) \\ &\stackrel{(b)}{=} \mathbf{a}^T \boldsymbol{\mu}_t^N + \mathbf{b}^T \nu^{\text{MF}}(\boldsymbol{\mu}_t^N, \pi_t) \\ &\quad + \frac{1}{N} \sum_{u \in \mathcal{U}} \sum_{i=1}^N f(x_t^i, u) \pi_t(x_t^i, \boldsymbol{\mu}_t^N)(u) \end{aligned}$$

Equality (a) follows from Assumption 2 while (b) uses the fact that  $\pi_t(x_t^i, \boldsymbol{\mu}_t^N)$  is a distribution. On the other hand,

$$\begin{aligned} &\frac{1}{N} \sum_{i=1}^N r(x_t^i, u_t^i, \boldsymbol{\mu}_t^{i,N}, \boldsymbol{\nu}_t^{i,N}) \\ &= \frac{1}{N} \sum_{i=1}^N \left[ \mathbf{a}^T \boldsymbol{\mu}_t^{i,N} + \mathbf{b}^T \boldsymbol{\nu}_t^{i,N} + f(x_t^i, u_t^i) \right] \\ &= \frac{1}{N} \sum_{i=1}^N \left[ \sum_{x \in \mathcal{X}} a(x) \boldsymbol{\mu}_t^{i,N}(x) + \sum_{u \in \mathcal{U}} b(u) \boldsymbol{\nu}_t^{i,N}(u) \right] \\ &\quad + \frac{1}{N} \sum_{i=1}^N f(x_t^i, u_t^i) \end{aligned}$$

Now the first term can be simplified as follows.

$$\begin{aligned} &\frac{1}{N} \sum_{x \in \mathcal{X}} a(x) \sum_{i=1}^N \sum_{j=1}^N W(i, j) \delta(x_t^j = x) \\ &= \frac{1}{N} \sum_{x \in \mathcal{X}} a(x) \sum_{j=1}^N \delta(x_t^j = x) \sum_{i=1}^N W(i, j) \\ &\stackrel{(a)}{=} \sum_{x \in \mathcal{X}} a(x) \frac{1}{N} \sum_{j=1}^N \delta(x_t^j = x) = \mathbf{a}^T \boldsymbol{\mu}_t^N \end{aligned}$$

Equality (a) follows as  $W$  is doubly-stochastic (Assumption 4). Similarly, the second term can be simplified as shown

below.

$$\begin{aligned}
& \frac{1}{N} \sum_{u \in \mathcal{U}} b(u) \sum_{i=1}^N \sum_{j=1}^N W(i, j) \delta(u_t^j = u) \\
&= \frac{1}{N} \sum_{u \in \mathcal{U}} b(u) \sum_{j=1}^N \delta(u_t^j = u) \sum_{i=1}^N W(i, j) \\
&\stackrel{(a)}{=} \sum_{u \in \mathcal{U}} b(u) \frac{1}{N} \sum_{j=1}^N \delta(u_t^j = u) = \mathbf{b}^T \boldsymbol{\nu}_t^N
\end{aligned}$$

Equality (a) follows from Assumption 4. Therefore, we get,

$$\begin{aligned}
& \mathbb{E} \left| \frac{1}{N} \sum_{i=1}^N r(x_t^i, u_t^i, \boldsymbol{\mu}_t^{i,N}, \boldsymbol{\nu}_t^{i,N}) - r^{\text{MF}}(\boldsymbol{\mu}_t^N, \pi_t) \right| \\
&\leq |\mathbf{b}|_1 \mathbb{E} |\boldsymbol{\nu}_t^N - \boldsymbol{\nu}^{\text{MF}}(\boldsymbol{\mu}_t^N, \pi_t)|_1 \\
&+ \frac{1}{N} \mathbb{E} \left| \sum_{i=1}^N f(x_t^i, u_t^i) - \sum_{i=1}^N \sum_{u \in \mathcal{U}} f(x_t^i, u) \pi_t(x_t^i, \boldsymbol{\mu}_t^N)(u) \right|
\end{aligned}$$

Using Lemma B.5, the first term can be upper bounded by  $|\mathbf{b}|_1 \sqrt{|\mathcal{U}|/N}$ . The second term can be bounded as follows.

$$\begin{aligned}
& \frac{1}{N} \mathbb{E} \left| \sum_{i=1}^N f(x_t^i, u_t^i) - \sum_{i=1}^N \sum_{u \in \mathcal{U}} f(x_t^i, u) \pi_t(x_t^i, \boldsymbol{\mu}_t^N)(u) \right| \\
&\leq \frac{1}{N} \sum_{u \in \mathcal{U}} \mathbb{E} \left| \sum_{i=1}^N f(x_t^i, u) [\delta(u_t^i = u) - \pi_t(x_t^i, \boldsymbol{\mu}_t^N)(u)] \right| \\
&\stackrel{(a)}{\leq} M_F \frac{\sqrt{|\mathcal{U}|}}{\sqrt{N}}
\end{aligned}$$

The term  $M_F > 0$  is such that  $|f(x, u)| \leq M_F, \forall x \in \mathcal{X}, \forall u \in \mathcal{U}$ . Such  $M_F$  always exists since  $\mathcal{X}$ , and  $\mathcal{U}$  are finite. Equality (a) is a result of Lemma B.4. In particular, we use the following facts to prove this result. The random variables  $\{\delta(u_t^i = u)\}_{i \in [N]}$  are conditionally independent given  $\mathbf{x}_t \triangleq \{x_t^i\}_{i \in [N]}$  (therefore, given  $\boldsymbol{\mu}_t^N$ ),  $\forall u \in \mathcal{U}$  and they lie in the interval  $[0, 1]$ . Moreover,

$$\begin{aligned}
& |f(x_t^i, u)| \leq M_F, \forall i \in [N], \forall u \in \mathcal{U}, \\
& \mathbb{E}[\delta(u_t^i = u) | \mathbf{x}_t] = \pi_t(x_t^i, \boldsymbol{\mu}_t^N), \\
& \sum_{u \in \mathcal{U}} \mathbb{E}[\delta(u_t^i = u) | \mathbf{x}_t] = 1
\end{aligned}$$

## I SAMPLING PROCEDURE

### References

Washim Uddin Mondal, Mridul Agarwal, Vaneet Aggarwal, and Satish V Ukkusuri. On the approximation of cooperative heterogeneous multi-agent reinforcement learning (marl) using mean field control (mfc). *Journal of Machine Learning Research*, 23(129):1–46, 2022.

---

### Algorithm 1 Sampling Algorithm

---

**Input:**  $\boldsymbol{\mu}_0, \pi_{\Phi_j}, P, r$

- 1: Sample  $x_0 \sim \boldsymbol{\mu}_0$ .
- 2: Sample  $u_0 \sim \pi_{\Phi_j}(x_0, \boldsymbol{\mu}_0)$
- 3:  $\boldsymbol{\nu}_0 \leftarrow \boldsymbol{\nu}^{\text{MF}}(\boldsymbol{\mu}_0, \pi_{\Phi_j})$  where  $\boldsymbol{\nu}^{\text{MF}}$  is defined in (8).
- 4:  $t \leftarrow 0$
- 5: FLAG  $\leftarrow$  FALSE
- 6: **while** FLAG is FALSE **do**
- 7:   FLAG  $\leftarrow$  TRUE with probability  $1 - \gamma$ .
- 8:   Execute Update
- 9: **end while**
- 10:  $T \leftarrow t$
- 11: Accept  $(x_T, \boldsymbol{\mu}_T, u_T)$  as a sample.
- 12:  $\hat{V}_{\Phi_j} \leftarrow 0, \hat{Q}_{\Phi_j} \leftarrow 0$
- 13: FLAG  $\leftarrow$  FALSE
- 14: SumRewards  $\leftarrow 0$
- 15: **while** FLAG is FALSE **do**
- 16:   FLAG  $\leftarrow$  TRUE with probability  $1 - \gamma$ .
- 17:   Execute Update
- 18:   SumRewards  $\leftarrow$  SumRewards +  $r(x_t, u_t, \boldsymbol{\mu}_t, \boldsymbol{\nu}_t)$
- 19: **end while**
- 20: With probability  $\frac{1}{2}$ ,  $\hat{V}_{\Phi_j} \leftarrow$  SumRewards. Otherwise  $\hat{Q}_{\Phi_j} \leftarrow$  SumRewards.
- 21:  $\hat{A}_{\Phi_j}(x_T, \boldsymbol{\mu}_T, u_T) \leftarrow 2(\hat{Q}_{\Phi_j} - \hat{V}_{\Phi_j})$ .

**Output:**  $(x_T, \boldsymbol{\mu}_T, u_T)$  and  $\hat{A}_{\Phi_j}(x_T, \boldsymbol{\mu}_T, u_T)$

**Procedure Update:**

- 1:  $x_{t+1} \sim P(x_t, u_t, \boldsymbol{\mu}_t, \boldsymbol{\nu}_t)$ .
- 2:  $\boldsymbol{\mu}_{t+1} \leftarrow P^{\text{MF}}(\boldsymbol{\mu}_t, \pi_{\Phi_j})$  where  $P^{\text{MF}}$  is defined in (9).
- 3:  $u_{t+1} \sim \pi_{\Phi_j}(x_{t+1}, \boldsymbol{\mu}_{t+1})$
- 4:  $\boldsymbol{\nu}_{t+1} \leftarrow \boldsymbol{\nu}^{\text{MF}}(\boldsymbol{\mu}_{t+1}, \pi_{\Phi_j})$
- 5:  $t \leftarrow t + 1$

**EndProcedure**

---
